# Supplementary material
Source: MDPI journal article supplement (https://www.mdpi.com/2673-7426/4/1/9)
Supplement: s1 [file s1]

## Supplementary Material

### Machine Learning Analysis of Genomic Factors Influencing Hyperbaric Oxygen Therapy in Parkinson's Disease

Eirini Banou<sup>1</sup>, Aristidis G. Vrahatis<sup>1</sup>, Marios G. Krokidis<sup>1,\*</sup> and Panagiotis Vlamos<sup>1</sup>

\*Correspondence: [mkrokidis@ionio.gr](mailto:mkrokidis@ionio.gr)

**Table S1.** List of genes that were found to be significant in the present approaches.

| top500_xgboost | top500_degs | top500_borda   | Xgb_Deg_overlap |
|----------------|-------------|----------------|-----------------|
| SNHG5          | MTRNR2L1    | MTRNR2L1       | MTRNR2L1        |
| MTRNR2L1       | CHRNA5      | VWA5A          | CHRNA5          |
| PLOD2          | NREP        | CHRNA5         | NREP            |
| FGF14          | PLCB4       | NNAT           | PLCB4           |
| MRPL23         | VWA5A       | PLCB4          | VWA5A           |
| DLK1           | TTC3P1      | C3ORF58        | TTC3P1          |
| SEZ6L          | TXNIP       | CRABP1         | TXNIP           |
| CCDC144NL.AS1  | ELAVL4      | TTC3           | ELAVL4          |
| S100A13        | RGS2        | ELAVL4         | TTC3            |
| SFRP1          | TTC3        | PTPRO          | SULF1           |
| RP11.122G18.7  | SULF1       | HIST1H4C       | NCALD           |
| PRDX1          | NCALD       | TXNIP          | WLS             |
| C14ORF37       | WLS         | FREM2          | TCF12           |
| IGFBP2         | TCF12       | TTC3P1         | TMSB4X          |
| ROBO2          | TMSB4X      | ROBO2          | NNAT            |
| PTCH1          | NNAT        | RP11.1094M14.7 | PTPRO           |
| CALB1          | PTPRO       | FOS            | DNAJC19         |
| PCSK1          | DNAJC19     | CCK            | ID3             |
| NBEA           | MSX1        | PPDPF          | FOXA2           |
| CDK6           | ID3         | PDZRN4         | ZNF428          |
| C3ORF58        | GULP1       | PLOD2          | HIST1H4C        |
| CRABP1         | MAGI2.AS3   | IGFBP5         | MAP2            |
| CGNL1          | FAM13C      | H1FX           | ASCL1           |
| NNAT           | FOXA2       | ASCL1          | UBE2J1          |
| MTUS1          | ZNF428      | CROT           | CD99            |
| VWA5A          | HIST1H4C    | CDKN1C         | GPM6A           |
| CD24           | MAP2        | TMSB4X         | PITX2           |
| CTNNA3         | ASCL1       | MACF1          | RP11.1094M14.7  |
| CCK            | PIK3R1      | SULF1          | MAP6            |

|                |                |               |               |
|----------------|----------------|---------------|---------------|
| PDZRN4         | UBE2J1         | RFX4          | MACF1         |
| GPC3           | CD99           | CTD.2287O16.1 | CMTM8         |
| CHRNA5         | GPM6A          | EPHB2         | EPHB2         |
| SPINK5         | PITX2          | CCNG2         | C3ORF58       |
| EPCAM          | RP11.1094M14.7 | MAP2          | CRABP1        |
| POU5F1         | MAP6           | NREP          | FREM2         |
| CELF2          | MACF1          | ID3           | CCNG2         |
| H1FX           | CMTM8          | CGNL1         | XBP1          |
| NPAS3          | EPHB2          | LMO4          | DMRTA2        |
| TFF3           | ALCAM          | SELENOP       | CDKN1C        |
| PPDPF          | C3ORF58        | NRP1          | LMX1A         |
| GRIA2          | CNTN4          | DKK1          | PAK3          |
| LINC00491      | CRABP1         | PITX2         | FOS           |
| OVOS2          | FREM2          | CMTM8         | WNT5A         |
| AGO1           | CCNG2          | CD99          | BMP7          |
| PLCB4          | XBP1           | MAP6          | SRGAP3        |
| PJA1           | DMRTA2         | TFF3          | ABCA8         |
| BICD2          | CDKN1C         | AP000769.1    | SELENOP       |
| CASZ1          | NR2F1          | CTNNA3        | WSB1          |
| IGFBP5         | LMX1A          | MIR124.2HG    | LMO4          |
| FREM2          | PAK3           | C14ORF37      | NR3C1         |
| FZD7           | FOS            | SPAG9         | CROT          |
| IFITM3         | CHN2           | ELF1          | CEP162        |
| AP000769.1     | WNT5A          | PAK3          | CTD.2287O16.1 |
| TDGF1          | BMP7           | F3            | SULF2         |
| HIST1H4C       | DDIT4          | NBEA          | SLIT2         |
| TOM1           | SRGAP3         | NPAS3         | ADAMTS9       |
| MIR302B        | ABCA8          | FOXA2         | NEBL          |
| PABPC1         | LMO3           | OVOS2         | CDO1          |
| C6ORF141       | SELENOP        | INSIG2        | MLLT11        |
| FOS            | WSB1           | NCALD         | NRP1          |
| TTC3           | LMO4           | WLS           | RFX4          |
| MICAL1         | NR3C1          | ZNF428        | JUN           |
| PTPRO          | CROT           | TCF12         | ROBO2         |
| PAPD7          | CEP162         | UBE2J1        | PPDPF         |
| RP11.1094M14.7 | CTD.2287O16.1  | CD24          | TERF2IP       |
| ELAVL4         | RFX3           | ARL4A         | LINC00261     |
| SYNE2          | NCAM1          | GPM6A         | IGFBP5        |
| INSIG2         | SULF2          | DNAJC19       | CCK           |
| NBPF8          | SLIT2          | CEP162        | TMTC4         |
| CAPN6          | ADAMTS9        | ABCA8         | CAP2          |
| DKK1           | NEBL           | NR3C1         | RHOBTB3       |
| B4GAT1         | CDO1           | HIST1H2AC     | F3            |
| CCND1          | COL3A1         | CAP2          | ARL4A         |
| ID4            | MLLT11         | H1F0          | PDZRN4        |

|               |            |           |            |
|---------------|------------|-----------|------------|
| TXNIP         | NRP1       | NEBL      | SPAG9      |
| CROT          | MYOF       | AGO1      | SMIM14     |
| CDH2          | RFX4       | ZNF844    | H1FX       |
| NFKB1         | JUN        | DMRTA2    | COL1A2     |
| ACAT2         | ROBO2      | PTCH1     | DZIP1      |
| RFX4          | PPDPF      | EPCAM     | STK3       |
| GATC          | TERF2IP    | CDO1      | TUBA1A     |
| HIST1H2AC     | LINC00261  | TMTC4     | SIPA1L2    |
| CKB           | IGFBP5     | JUN       | ZNF503     |
| PARM1         | CCK        | BMP7      | ELF1       |
| ARMC3         | MMRN1      | SRGAP3    | MIR124.2HG |
| HIST1H1E      | TMTC4      | RAB21     | ANKRD36    |
| PTN           | CAP2       | TERF2IP   | SLC39A8    |
| TTC3P1        | RHOBTB3    | TUBA1A    | ST13P15    |
| AC104532.4    | F3         | COL1A2    | PLOD2      |
| PMAIP1        | ADAMTS6    | ADAMTS9   | H1F0       |
| BNC2          | MXI1       | RHOBTB3   | ZBTB20     |
| TTR           | ARL4A      | TLE4      | DKK1       |
| CTD.2287O16.1 | PDZRN4     | LMX1A     | SYT11      |
| HSPD1         | PPM1K      | TCTEX1D2  | APLP1      |
| PEG10         | SPAG9      | RUFY3     | TXLNB      |
| MIF           | DLL1       | XBP1      | TCTEX1D2   |
| TCAIM         | SMIM14     | KIF5C     | ZSCAN18    |
| ZFP42         | H1FX       | HMGCS1    | VAMP2      |
| CDKN1C        | DDC        | RCAN3     | STARD4.AS1 |
| STMN2         | COL1A2     | WNT5A     | RAB21      |
| POU6F2        | PARP4      | MLLT11    | P4HA1      |
| PRC1          | DZIP1      | PLD3      | VPS13C     |
| CCDC125       | STK3       | WSB1      | KIF21A     |
| CENPF         | TUBA1A     | DST       | SSFA2      |
| MIR124.2HG    | LRP2       | LINC00261 | RCAN3      |
| IFITM2        | SIPA1L2    | CELF2     | DST        |
| ASCL1         | ZNF503     | BNIP3P1   | TLE4       |
| DAB2          | ADGRG1     | STMN2     | YPEL5      |
| ENO3          | KCNJ16     | CADM2     | CGNL1      |
| ZFHx4         | ELF1       | SSFA2     | ZNF844     |
| FEZF1.AS1     | GADD45G    | SEMA3E    | AP000769.1 |
| ANKRD49       | DCX        | TEAD1     | SEMA3C     |
| NRP1          | FOXP1      | DZIP1     | ANKRD26    |
| ELF1          | MIR124.2HG | SCAPER    | RUFY3      |
| RP11.543B16.1 | EVL        | FMR1      | ZFHx3      |
| IFITM1        | ANKRD36    | APLP1     | TFF3       |
| SCAPER        | SLC39A8    | ANKRD36   | SSBP3      |
| CNTRL         | MLLT3      | OXR1      | CADM2      |
| MACF1         | PROX1      | ARMC3     | INSIG2     |

|              |               |              |           |
|--------------|---------------|--------------|-----------|
| CCNG2        | ST13P15       | RBP1         | SOX11     |
| PLIN2        | PLOD2         | BNIP3        | OXR1      |
| SEMA3E       | KCNQ1OT1      | KIF21A       | RBP1      |
| SLC38A7      | RP11.125O18.1 | P4HA1        | TEAD1     |
| LGI1         | H1F0          | ANKRD26      | CTNNA3    |
| LMO4         | KLHDC8B       | CASZ1        | FMR1      |
| EPHB2        | ZBTB20        | FGF14        | PLD3      |
| ZNF844       | DKK1          | TXLNB        | HMGCS1    |
| SPAG9        | SYT11         | ABHD2        | ZBTB18    |
| SELENOP      | APLP1         | ZBTB18       | BNIP3P1   |
| EPHA4        | DUSP1         | AKAP9        | HIST1H2AC |
| DPPA4        | CDH11         | VPS13C       | SYNE1     |
| KIF5C        | JAKMIP2       | MAP1B        | SLC8A1    |
| ZNF514       | PLCL1         | ZNF503       | TTC6      |
| TRIM38       | FRMD4A        | SOX11        | NPAS3     |
| CRABP2       | TXLNB         | CDK6         | OVOS2     |
| FST          | TCTEX1D2      | VAMP2        | KIF5C     |
| TMSB4X       | ZSCAN18       | PRTG         | C14ORF37  |
| PDK1         | PLXDC2        | FAM184A      | BNIP3     |
| XPR1         | VAMP2         | APPL2        | APPL2     |
| FZD8         | STARD4.AS1    | SEMA3C       | NBEA      |
| CASC9        | RAB21         | LHFP         | SRRM4     |
| LGALS1       | P4HA1         | CEP290       | CEP290    |
| MAP2         | VPS13C        | RP11.144L1.8 | CD24      |
| RP11.144L1.8 | KIF21A        | SPON1        | RSPO2     |
| SULF1        | SSFA2         | ZSCAN18      | AKAP9     |
| HMGCS1       | RCAN3         | ZBTB20       | FAM184A   |
| GAPDH        | NKAIN4        | SULF2        | AGO1      |
| CENPE        | RBM24         | ID2          | SCARB2    |
| ABHD2        | CFAP70        | SDC2         | SEMA3E    |
| F3           | PPP2R2B       | YPEL5        | STC2      |
| THAP6        | DST           | ST13P15      | MAP1B     |
| GPR161       | TLE4          | BNC2         | SCAPER    |
| PTPN13       | PPP1R3B       | ZFHX3        | SDC2      |
| KIF16B       | LRTM1         | SIPA1L2      | EPCAM     |
| PLD3         | FAM172A       | WDR78        | SRGAP1    |
| FKTN         | YPEL5         | HIST1H1E     | STMN2     |
| LHFP         | PIEZO2        | SLIT2        | TPT1.AS1  |
| ASPM         | PDE4D         | STARD4.AS1   | SLC7A11   |
| H1F0         | SIAH3         | SERPINF1     | PTCH1     |
| ID3          | CGNL1         | RSPO2        | WDR78     |
| ARHGAP21     | CCDC191       | STK3         | PRTG      |
| RUFY3        | EPB41L3       | TTC6         | XRN1      |
| L1TD1        | ZNF844        | SYT11        | ABHD2     |
| CENPA        | C6ORF118      | SMIM14       | ZMAT1     |

|          |            |           |              |
|----------|------------|-----------|--------------|
| PITX2    | AP000769.1 | ZFHX4     | SYT4         |
| B9D1     | MYLIP      | CALB1     | SPON1        |
| ARL4A    | FAT3       | TGFB2     | SATB1        |
| BNIP3P1  | CXXC4      | SCN7A     | ULK2         |
| RAB21    | MEIS2      | SLC39A8   | ARMC3        |
| THY1     | SEMA3C     | TPBG      | SCN7A        |
| ARL13B   | ANKRD26    | ITSN2     | ID2          |
| CMTM8    | LSAMP      | ULK2      | ZFP30        |
| NREP     | MAP1A      | SSBP3     | CELF2        |
| STAM2    | AFF3       | SLK       | LHFP         |
| TLE4     | RUFY3      | PTN       | VEGFA        |
| TNFRSF21 | GRINA      | PDK1      | TPBG         |
| NRIP1    | ZFHX3      | TTR       | RP11.144L1.8 |
| PAK3     | TFF3       | B4GAT1    | SERPINF1     |
| ARHGAP32 | SSBP3      | PEG10     | SPOCK1       |
| CD99     | FOXP2      | CHD6      | SLC18A1      |
| ZBTB38   | CADM2      | FKTN      | YPEL2        |
| MAP6     | INSIG2     | VEGFA     | TGFB2        |
| AP5M1    | SOX11      | ID4       | SLC43A2      |
| ACTC1    | FAM228B    | XRN1      | CASZ1        |
| TEAD1    | OXR1       | SYNE1     | TTLL1        |
| CADM2    | RBP1       | ARHGAP21  | ITSN2        |
| FMR1     | IL6ST      | SCARB2    | SLIT1        |
| BNIP3    | TEAD1      | SRRM4     | CHD6         |
| PRTG     | DACH1      | THAP6     | SIM1         |
| SLK      | CTNNA3     | SATB1     | ZC3H12C      |
| MKI67    | FMR1       | NBPF8     | SLK          |
| TCTEX1D2 | PLD3       | GRIA2     | FGF14        |
| EGFEM1P  | HMGS1      | TPT1.AS1  | ZNF354C      |
| CAP2     | ZBTB18     | SLC8A1    | SRSF12       |
| RCAN3    | BNIP3P1    | STC2      | CDK6         |
| ANXA2    | PCBP4      | ZBTB38    | SYT1         |
| MAP1B    | CACNA2D1   | ZMAT1     | SSH2         |
| PYGO1    | HIST1H2AC  | SRGAP1    | SLC8A1.AS1   |
| WASF3    | SYNE1      | ZFP30     | VANGL2       |
| DST      | COL5A2     | WASF3     | STMN4        |
| OXR1     | SLC8A1     | SOX21.AS1 | BNC2         |
| CEP162   | TTC6       | SYT4      | SAMD5        |
| AKAP9    | TET2       | SIAH3     | HIST1H1E     |
| EFNB2    | NPAS3      | ANKRD49   | ZFHX4        |
| GRAMD1B  | OVOS2      | SLC7A11   | ZNF654       |
| SERPINF1 | KIF5C      | NRIP1     | ST18         |
| SPON1    | NTN1       | VANGL2    | PDK1         |
| RBP1     | C14ORF37   | YPEL2     | FKTN         |
| TUBA1A   | ARHGAP29   | ARHGAP32  | XPA          |

|              |               |            |            |
|--------------|---------------|------------|------------|
| RP11.392P7.1 | CNTN6         | CCDC125    | ZNF503.AS2 |
| ITSN2        | SOX21.AS1     | SOX21      | NA         |
| SAMD4B       | HMG2P5        | TET2       | NA         |
| NEBL         | DNAJB4        | SPAG16     | NA         |
| TGFB2        | RP11.123K19.1 | XPA        | NA         |
| COL1A2       | BNIP3         | USP5       | NA         |
| ID2          | GRHL2         | TAGLN3     | NA         |
| NR3C1        | NDN           | TTLL1      | NA         |
| EGFL6        | APPL2         | AC104532.4 | NA         |
| TMTC4        | GPC2          | ZC3H12C    | NA         |
| FOXA2        | FGD6          | STAM2      | NA         |
| ABCA8        | NBEA          | SAMD5      | NA         |
| NFXL1        | FLRT3         | ZNF654     | NA         |
| SSFA2        | TAGLN3        | SLC18A1    | NA         |
| VIM          | C14ORF132     | USP53      | NA         |
| TAGLN        | SRRM4         | SEMA4D     | NA         |
| ZNF428       | GSTM3         | TSC22D3    | NA         |
| JUN          | CEBPD         | SHH        | NA         |
| UBE2J1       | CREBRF        | PYGO1      | NA         |
| CDO1         | AKT3          | WDR60      | NA         |
| TERF2IP      | MBNL2         | NFXL1      | NA         |
| AC007383.6   | CEP290        | UNC5D      | NA         |
| GPM6A        | CD24          | SPOCK1     | NA         |
| COMT         | DLL3          | ZNF354C    | NA         |
| FAM184A      | KITLG         | ZNF503.AS2 | NA         |
| RHOBTB3      | CHD3          | INA        | NA         |
| DHRX         | RSPO2         | SPEF2      | NA         |
| ASNS         | SHH           | EFNB2      | NA         |
| WLS          | FHL1          | SYT7       | NA         |
| NCALD        | EGR1          | TIPARP     | NA         |
| TCF12        | AKAP9         | SPAG1      | NA         |
| CHD6         | AGO3          | TRIM9      | NA         |
| LINC01021    | ASXL3         | TCAIM      | NA         |
| ZBTB18       | FAM184A       | TTLL3      | NA         |
| HMGB2        | AGO1          | SLC43A2    | NA         |
| DMRTA2       | TIPARP        | SIM1       | NA         |
| BCL2L1       | OSBPL10       | SSH2       | NA         |
| DNAJC19      | COLEC12       | SRSF12     | NA         |
| ADAMTS9      | SCARB2        | TOPORS.AS1 | NA         |
| PALLD        | ATP6V0A1      | SOX2.OT    | NA         |
| CLSPN        | SEMA3E        | SLIT1      | NA         |
| APLP1        | DNAJB2        | THSD7A     | NA         |
| BMP7         | CDHR3         | SYT1       | NA         |
| SRGAP3       | STC2          | TAOK1      | NA         |
| PFKP         | RGS16         | TENM2      | NA         |

|            |               |              |    |
|------------|---------------|--------------|----|
| AC105399.2 | TSC22D3       | SAMD4B       | NA |
| ANKRD26    | RP11.834C11.4 | SERTAD2      | NA |
| TPBG       | MAP1B         | TEX15        | NA |
| UGP2       | COX6CP1       | EGFL6        | NA |
| MTATP6P1   | CPEB4         | TMEM263      | NA |
| ARL6IP1    | LYST          | ACAT2        | NA |
| MIAT       | SCAPER        | RTN1         | NA |
| PMEL       | SOX21         | ST18         | NA |
| INA        | SDC2          | TMEM169      | NA |
| TERF1      | EPCAM         | STMN4        | NA |
| CEP290     | SRGAP1        | KIF16B       | NA |
| TBC1D23    | STMN2         | RSPH4A       | NA |
| ANKRD36    | TPT1.AS1      | SDSL         | NA |
| APPL2      | IPP           | MIAT         | NA |
| MLLT11     | CADPS         | TSPAN13      | NA |
| GPATCH4    | HSPB1         | SAT1         | NA |
| DZIP1      | LPGAT1        | TFPI2        | NA |
| KIF21A     | THSD7A        | SLC8A1.AS1   | NA |
| SOX11      | SLC7A11       | ZNF471       | NA |
| P4HA1      | RP1.146I3.1   | TTYH2        | NA |
| LINC00261  | HES6          | SDAD1P1      | NA |
| PCLO       | SPAG16        | ZNF568       | NA |
| SDC2       | PTCH1         | SEZ6L2       | NA |
| LMX1A      | APPBP2        | TAGLN2       | NA |
| WDR78      | WDR78         | AC105399.2   | NA |
| UACA       | LRRC27        | SGSM2        | NA |
| USP5       | RORA          | SLC16A14     | NA |
| UNC5D      | PRTG          | ZNF514       | NA |
| WHAMMP3    | XRN1          | ZNF337       | NA |
| TWF2       | NSMCE3        | SLC16A3      | NA |
| SCN7A      | CRIP2         | ZFP42        | NA |
| WDR60      | NENF          | MIF          | NA |
| SELENBP1   | CCDC173       | TRIM38       | NA |
| WNT5A      | ABHD2         | TMEM161B.AS1 | NA |
| WNT7B      | ZMAT1         | WHAMMP3      | NA |
| WSB1       | RAB22A        | CNTRL        | NA |
| USP40      | FBXW7         | VPS8         | NA |
| WWTR1      | HSPA4L        | SLC2A4RG     | NA |
| XBP1       | RIMKLA        | ZFH4.AS1     | NA |
| XPA        | ANKRD36B      | SETBP1       | NA |
| SDSL       | SYT4          | TBC1D23      | NA |
| TTPAL      | TRIM9         | SCG3         | NA |
| USP53      | MAMDC2        | SLFN5        | NA |
| SCUBE1     | SPON1         | TGFBR3       | NA |
| VPS11      | SATB1         | TERF1        | NA |

|            |            |            |    |
|------------|------------|------------|----|
| TXLNB      | TAOK1      | SLC12A2    | NA |
| VPS13C     | ULK2       | GOLGA6L2   | NA |
| VPS33A     | FMNL2      | SOS2       | NA |
| SDK2       | CAB39L     | SIM2       | NA |
| VPS37B     | FAM46A     | THAP2      | NA |
| VPS8       | PHYHIPL    | ZBTB4      | NA |
| UMAD1      | ARMC3      | SCN3B      | NA |
| ULK2       | TMEM263    | BCL2L1     | NA |
| SEMA4D     | APCDD1     | TMEM163    | NA |
| TTYH2      | PIGP       | SOX5       | NA |
| VEGFA      | TENM2      | ST6GALNAC5 | NA |
| SDHAF4     | TMEM169    | POU5F1     | NA |
| USP38      | GPRC5C     | TMEM65     | NA |
| VWDE       | EPB41L4A   | ZFAND2A    | NA |
| WAC.AS1    | SCN7A      | SPATA17    | NA |
| SDAD1P1    | GOLGA6L2   | PCLO       | NA |
| VAV2       | ARID5B     | SLC35D1    | NA |
| SCUBE3     | ENKUR      | SLC7A2     | NA |
| SEC22B     | ID2        | ZHX1       | NA |
| VANGL2     | FSIP2      | ZNF189     | NA |
| UBR3       | ZFP30      | ZNF316     | NA |
| TTLL3      | TEX15      | TSHZ1      | NA |
| VAMP2      | GNG2       | HIST1H1A   | NA |
| UBE2C      | PPM1L      | ZBTB16     | NA |
| SEMA3C     | NRCAM      | TMEM132A   | NA |
| SLC7A2     | CELF2      | SLC2A13    | NA |
| SCN3B      | PDGFD      | VWDE       | NA |
| ZNF501     | NPL        | SOX6       | NA |
| ZNF793.AS1 | NEUROD1    | YWHAZP2    | NA |
| ZNF789     | CST3       | TPPP3      | NA |
| ZNF765     | CEP126     | SBDSP1     | NA |
| RSPO2      | CCDC122    | TNFRSF21   | NA |
| ZNF654     | GIPR       | TMEM88     | NA |
| RTN1       | GPRIN3     | SNAI2      | NA |
| ZNF614     | C6ORF89    | CCND1      | NA |
| ZNF611     | FAM214A    | SORBS2     | NA |
| RUNX1T1    | ADAM9      | ZADH2      | NA |
| ZNF583     | ANO4       | B9D1       | NA |
| RXRA       | LHFP       | VAV2       | NA |
| S1PR1      | SYT7       | SNIP1      | NA |
| SAMD5      | EYA4       | ENKUR      | NA |
| ZNF580     | TOPORS.AS1 | ZNF580     | NA |
| SASH1      | VEGFA      | USP38      | NA |
| ZNF568     | FAM110B    | ARL6IP1    | NA |
| ZNF562     | SERTAD2    | SIAH2      | NA |



|            |               |               |    |
|------------|---------------|---------------|----|
| ZNF561.AS1 | FAM210B       | TRAM1L1       | NA |
| ZNF516     | CBFA2T2       | COLEC12       | NA |
| ZNF503.AS2 | TPBG          | VTN           | NA |
| ZNF503     | CCDC146       | KLK1          | NA |
| ZNF816     | SPEF2         | TRAM2.AS1     | NA |
| ZNF860     | RGS4          | S1PR1         | NA |
| RSPH4A     | SPAG1         | DDIT4         | NA |
| AC010095.6 | RP11.144L1.8  | TMEM19        | NA |
| AC093698.1 | NME5          | SETD7         | NA |
| AC092798.2 | HIST1H1A      | FAM13C        | NA |
| AC072052.7 | MIR99AHG      | PTPN13        | NA |
| AC019129.1 | LBH           | ZNF333        | NA |
| AC015977.5 | RP11.1217F2.1 | TMEM47        | NA |
| AC012671.2 | PCSK2         | SLC25A12      | NA |
| AC012354.6 | DMD           | AC010095.6    | NA |
| AC010468.1 | TFPI2         | SLC22A18      | NA |
| AC010150.1 | SERPINF1      | ZNF583        | NA |
| AC009963.5 | FZD1          | SIK2          | NA |
| ZSCAN16    | CEP41         | DUSP1         | NA |
| AC009517.2 | MAGI2         | ZNF423        | NA |
| AC009005.2 | SPOCK1        | EVL           | NA |
| AC007389.2 | BTG2          | DDC           | NA |
| AC007283.4 | FSD1L         | NHLH1         | NA |
| AC007279.2 | SOX2.OT       | DCX           | NA |
| AC006273.5 | PTPRM         | TIAM2         | NA |
| AC005534.6 | ABCG1         | ZNF26         | NA |
| AC002075.4 | SLC18A1       | SMYD2         | NA |
| ZSCAN18    | SGSM2         | SPA17P1       | NA |
| SAT1       | ATP8B1        | GULP1         | NA |
| SATB1      | PAPSS2        | RP11.404O13.5 | NA |
| XRN1       | CLDN5         | SF3A2         | NA |
| ZNF484     | CLUAP1        | ZBTB40        | NA |
| ZFHX3      | GOLGA1        | SELENBP1      | NA |
| ZFAND2A    | TSPAN13       | ZNF432        | NA |
| ZDHHC9     | GPR85         | SCD5          | NA |
| TTC6       | YPEL2         | DLL1          | NA |
| ZDHHC7     | MAGI3         | TNRC6C        | NA |
| ZCCHC4     | TGFB2         | TLE3          | NA |
| ZCCHC2     | SLC43A2       | SDHAF4        | NA |
| SCG2       | CASZ1         | TTC30A        | NA |
| ZC3H12C    | TTLL1         | SCN3A         | NA |
| ZBTB40     | RGAG4         | EPB41L3       | NA |
| SCG3       | CHMP4BP1      | SCG2          | NA |
| ZBTB4      | DGKB          | SPAG17        | NA |
| ZBTB20     | IQCE          | WAC.AS1       | NA |

|            |               |            |    |
|------------|---------------|------------|----|
| ZBTB16     | HIST1H1D      | ZNF362     | NA |
| ZBED3      | POSTN         | CXXC4      | NA |
| ZADH2      | KIFAP3        | ZNF516     | NA |
| YWHAZP2    | ARL6IP1P3     | EGR1       | NA |
| YPEL5      | ITSN2         | DACH1      | NA |
| YPEL2      | LINC00936     | SLC37A1    | NA |
| YJEFN3     | IRAK4         | ZNF793.AS1 | NA |
| YIF1B      | MATN2         | TTC30B     | NA |
| SCD5       | SLIT1         | TCAF1      | NA |
| ZFHX4.AS1  | MKL2          | FAM172A    | NA |
| ZFP30      | NR2F2         | GATC       | NA |
| SBDSP1     | NUMA1         | SOGA1      | NA |
| ZNF483     | TMEM161B.AS1  | SIMC1      | NA |
| ZNF48      | NDRG1         | ATP1A2     | NA |
| ZNF471     | C9ORF16       | SMPD1      | NA |
| ZNF432     | CHD6          | MIR302B    | NA |
| ZNF423     | FOXJ1         | ENO3       | NA |
| ZNF385D    | ATXN1         | TH         | NA |
| ZNF362     | RP11.227H15.5 | TAOK3      | NA |
| ZNF358     | CCDC30        | SNAP25     | NA |
| ZNF354C    | GSE1          | TRAF3IP1   | NA |
| ZNF337     | ANK3          | DNAJB4     | NA |
| ZFP62      | CAMK2N1       | TAPT1      | NA |
| ZNF333     | SIM1          | SCGN       | NA |
| ZNF316     | CFLAR         | TSPYL2     | NA |
| ZNF274     | EGLN1         | GADD45G    | NA |
| SCARB2     | EFNB3         | EBF3       | NA |
| ZNF26      | HAPLN1        | SIRT6      | NA |
| ZNF248     | MORC4         | ZNF358     | NA |
| ZNF189     | IKZF2         | SCUBE1     | NA |
| ZMAT1      | RP11.404O13.5 | SPATA13    | NA |
| ZHX1       | RP11.51L5.2   | SYT17      | NA |
| TTLL1      | LOXL1         | ZNF470     | NA |
| TPT1.AS1   | ZC3H12C       | TMEM178B   | NA |
| SEMA6D     | GNG11         | CYP1B1     | NA |
| SLC16A14   | SEZ6L2        | FOXP1      | NA |
| STARD4.AS1 | ANKRA2        | PJA1       | NA |
| ST7        | ANKRD13A      | UBR3       | NA |
| ST6GALNAC5 | SLK           | DLL3       | NA |
| ST3GAL1    | NT5C3AP1      | ZNF860     | NA |
| SIRT6      | FGF14         | ZNF484     | NA |
| SLC12A2    | ARX           | RSPH1      | NA |
| ST18       | KIAA1257      | GPC2       | NA |
| ST13P15    | LRRC6         | SEMA3D     | NA |
| SSH2       | ZNF354C       | GRINA      | NA |

|          |               |               |    |
|----------|---------------|---------------|----|
| SLC16A11 | KDM6B         | FRMD4A        | NA |
| SLC16A3  | FNDC5         | DNAJB2        | NA |
| TTC39C   | SRSF12        | STK39         | NA |
| SSBP3    | FER1L4        | TNKS1BP1      | NA |
| SRSF12   | CDK6          | SERTAD3       | NA |
| SRRM4    | SYT1          | FAT3          | NA |
| SRR      | TAGLN2        | SCUBE3        | NA |
| SLC18A1  | SSH2          | SNCA          | NA |
| SLC19A2  | KLK1          | TIGD2         | NA |
| SLC22A18 | RCOR2         | TPD52L1       | NA |
| SRGAP1   | AC005154.6    | WDR66         | NA |
| SLC25A12 | ANKMY2        | WDR31         | NA |
| SRF      | NCKAP5        | EPB41L4A      | NA |
| SIRT5    | LMBR1L        | COL21A1       | NA |
| STAT6    | SLC8A1.AS1    | ALCAM         | NA |
| STC2     | PNMA2         | TMEM59L       | NA |
| SIPA1L2  | NEAT1         | GRHL2         | NA |
| SYT4     | VANGL2        | SYP           | NA |
| SYT17    | ATP1A2        | FAM110B       | NA |
| SYT11    | STMN4         | FAM228B       | NA |
| SYT1     | C8ORF4        | EYA4          | NA |
| SYP      | RP11.620J15.3 | ADAMTS6       | NA |
| SYNPO2   | LRP11         | GSTM3         | NA |
| SIK2     | PDE3A         | TRAF7         | NA |
| SIL1     | LRR1Q1        | FOXP2         | NA |
| SYNJ2    | TMEM163       | ADGRG1        | NA |
| SYNE1    | ATP10D        | CHN2          | NA |
| SIM1     | BNC2          | FGD6          | NA |
| SYMPK    | MIR210HG      | CFAP45        | NA |
| SIM2     | AFDN.AS1      | CALB2         | NA |
| SULF2    | SETBP1        | SEMA6D        | NA |
| STON1    | CLDN4         | FLRT3         | NA |
| STN1     | NUAK1         | FHL1          | NA |
| STMN4    | ERGIC1        | EDN1          | NA |
| SIMC1    | RP11.33B1.1   | SLITRK5       | NA |
| STK39    | NHLH1         | EGLN1         | NA |
| STK3     | SAMD5         | RP11.404O13.4 | NA |
| STIM1    | AGPAT3        | EFNB3         | NA |
| SPRY2    | DOC2B         | SYNJ2         | NA |
| SPOCK1   | HIST1H1E      | HES6          | NA |
| SLC25A14 | TGFBR3        | GPRC5C        | NA |
| SOBP     | NUDT4         | CNTN4         | NA |
| SNN      | RSPH1         | GRAMD1B       | NA |
| SLC35E2B | POLR3GL       | DAB2          | NA |
| SNIP1    | ZFHX4         | TTC25         | NA |

|            |            |            |    |
|------------|------------|------------|----|
| SLC37A1    | ZNF654     | TRPS1      | NA |
| SNCA       | IGBP1P1    | XPR1       | NA |
| SNAI2      | BMT2       | WNT7B      | NA |
| SMYD2      | AGO4       | DMD        | NA |
| SLC39A8    | HIST2H2BE  | GNG2       | NA |
| SMPD1      | NCOA6      | GPRIN3     | NA |
| SLC41A1    | ST18       | SLC16A11   | NA |
| SMIM14     | MOK        | AC007283.4 | NA |
| SMAD9      | THAP2      | SPAG4      | NA |
| SLITRK6    | DDIT3      | TSPAN19    | NA |
| SLC43A2    | PDK1       | ARHGAP29   | NA |
| SLITRK5    | B3GALT2    | COL3A1     | NA |
| SLIT2      | COPE       | SRR        | NA |
| SLC7A11    | MLLT1      | TP53I13    | NA |
| SLIT1      | RAB11B     | TIGD1      | NA |
| SLFN5      | TPPP3      | GIPR       | NA |
| SLC8A1.AS1 | FKTN       | AFF3       | NA |
| SLC8A1     | XPA        | TOM1       | NA |
| SNX19      | GADD45A    | FBXW7      | NA |
| SORBS2     | ZNF503.AS2 | AC008753.3 | NA |
| SPIN4      | CELSR2     | ASXL3      | NA |

---
